# Supplementary material for: High-performance dye-sensitized solar cell using dimensionally controlled titania synthesized at sub-zero temperatures
Source: Royal Society of Chemistry journal article supplement (doi:10.1039/c6ra00227g), 2016-01-01
Supplement: c6ra00227g1.pdf [file c6ra00227g1.pdf]

## High Performance Dye Sensitized Solar Cell Using Dimensionally Controlled Titania Synthesized at Sub-Zero Temperatures

*Kiran P. Shejale, Devika Laishram, and Rakesh K. Sharma*

Department of Chemistry, Indian Institute of Technology Jodhpur, Jodhpur, 342011, India

### ***ESI Note S1. Raman spectroscopy analysis of anatase and rutile crystallographic phases.***

Anatase TiO<sub>2</sub> consists of the space group I4/amd (D<sub>4h</sub><sup>19</sup>) and it is assisted with two TiO<sub>2</sub> units in the Bravais cell. These crystals show the present lattice vibrations at the Brillouin zone.<sup>29</sup>

$$\Gamma = a_{1g} + a_{2u} + 2b_{1g} + b_{2u} + 3e_g + 2e_u \quad (1)$$

The a<sub>1g</sub>, 2b<sub>1g</sub> and 3e<sub>g</sub> are Raman active modes whereas the remaining three are infra-red active.<sup>25</sup> Rutile TiO<sub>2</sub> consists of the P4/mmm (D<sub>4h</sub><sup>14</sup>) structure and lattice vibrations at K=0 in Brillouin zone given as

$$\Gamma = a_{1g} + a_{2g} + a_{2u} + b_{1g} + b_{2g} + 2b_{1u} + e_g + 3e_u \quad (2)$$

The four vibrations a<sub>1g</sub>, b<sub>1g</sub>, b<sub>2g</sub> and 3e<sub>g</sub> are Raman active modes.<sup>30</sup>

### ***ESI Note S2. Weight percentage calculation of rutile.***

Anatase and rutile mixed phase are found in both the samples, using equation (3) weight percentage of rutile present in the prepared samples are estimated.<sup>6</sup>

$$WR = \frac{IR}{0.884IA + IR} \quad (3)$$

where IR and IA are diffraction peak intensities of rutile (110) and anatase (101). In the above equation, values of IR and IA are inserted for both samples and WR are calculated for both samples.

### ***ESI Note S3. Lattice strain present on the grain boundary***

To confirm this finding, the lattice strain present on the grain boundary is calculated from the XRD analysis of both samples using Williamson-Hall equation.<sup>34</sup>

$$\frac{\beta \cos \theta}{\lambda} = \frac{1}{D} + \eta \frac{\sin \theta}{\lambda} \quad (4)$$

Where,  $\beta$  and  $\theta$  in equation (4) are full width half maximum (FWHM) and half the diffraction angle of diffraction peaks of anatase, rutile and mixed rutile-anatase phases.  $\lambda$  and  $D$  are the wavelength of X-ray and crystal size respectively. And  $\eta$  is lattice strain value. Figure S3 (Supporting information) shows linearly fitted graphs with  $\beta \cos \theta / \lambda$  as X axis and  $\sin \theta / \lambda$  as Y axis. The slope of the linearly fitted line is taken as effective lattice strain. This equation also represents a Uniform Deformation Model (UDM) where an assumption is made that in all the crystallographic direction uniformity of strain is present. Williamson-Hall plot of both samples with an error value also known as residual square are shown in figure S3 (Supporting information).

### ***ESI Note S4. Dye loading***

The adsorption spectra of the samples show two visible bands near 370 and 500 nm and can be described by the metal to ligand charge transfer shown in Figure S4 (supporting information). This parameter helps to measure the amount of the dye adsorbed by samples. The Beer Lambert law  $A = \epsilon lc$  was used to determine the dye loading value of the photoanode, the absorption value at 500 nm was considered. Where  $A$  is the absorbance at 500 nm,  $\epsilon$  is the molar extinction coefficient of the N719 dye at 500 nm which is 8175/Mcm,  $l = 1$  cm is the distance travel by light beam through solution and  $c$  is the concentration of dye adsorbed by the sample.

**Figure S1.** The current density – voltage curve of DSSCs where photoanode made of TiO<sub>2</sub> prepared at -40 °C, -30 °C, -20 °C and -10 °C.

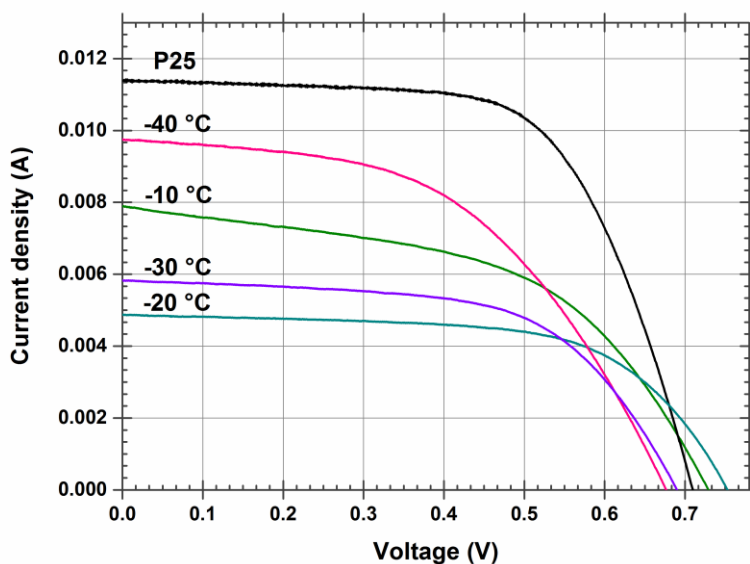

Samples over a range of temperature from -40 °C to -10 °C were synthesized in the reactor and correspondingly their cells were fabricated. Respective current density – voltage graph is plotted as given in figure S1. As temperature decreases the efficiency increases except for -10 °C where a higher efficiency is observed than -30 °C and -20 °C. And, hence -40 °C and -10 °C samples are studied than the rest to design high photoconversion efficient DSSC.

**Table A1:** Parameters of DSSC fabricated at various conditions

| Sample                             | Anatase Wt. % | Rutile Wt. % | Efficiency |
|------------------------------------|---------------|--------------|------------|
| Anatase (See ref. 46 in table S2 ) | 100           | 0            | 4.01       |
| Rutile (See ref. 47 table S2 )     | 0             | 100          | 3.2        |
| -40 °C                             | 58            | 42           | 3.3        |
| -10 °C                             | 27            | 73           | 2.9        |

**Figure S2.** Williamson Hall plot of both samples to determine the lattice strain, derived from the XRD data of both samples.

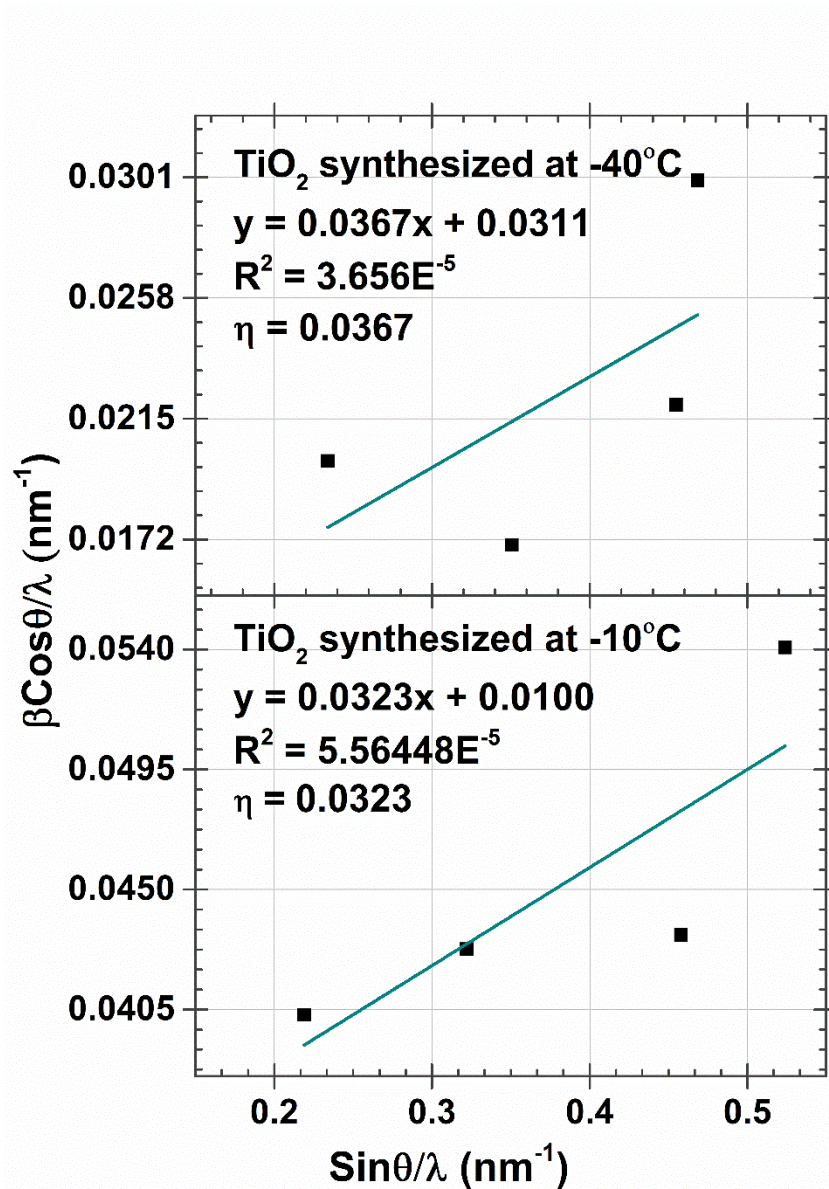

**Figure S3.** AFM images of the S1, S2 and S3 sample photoanodes.

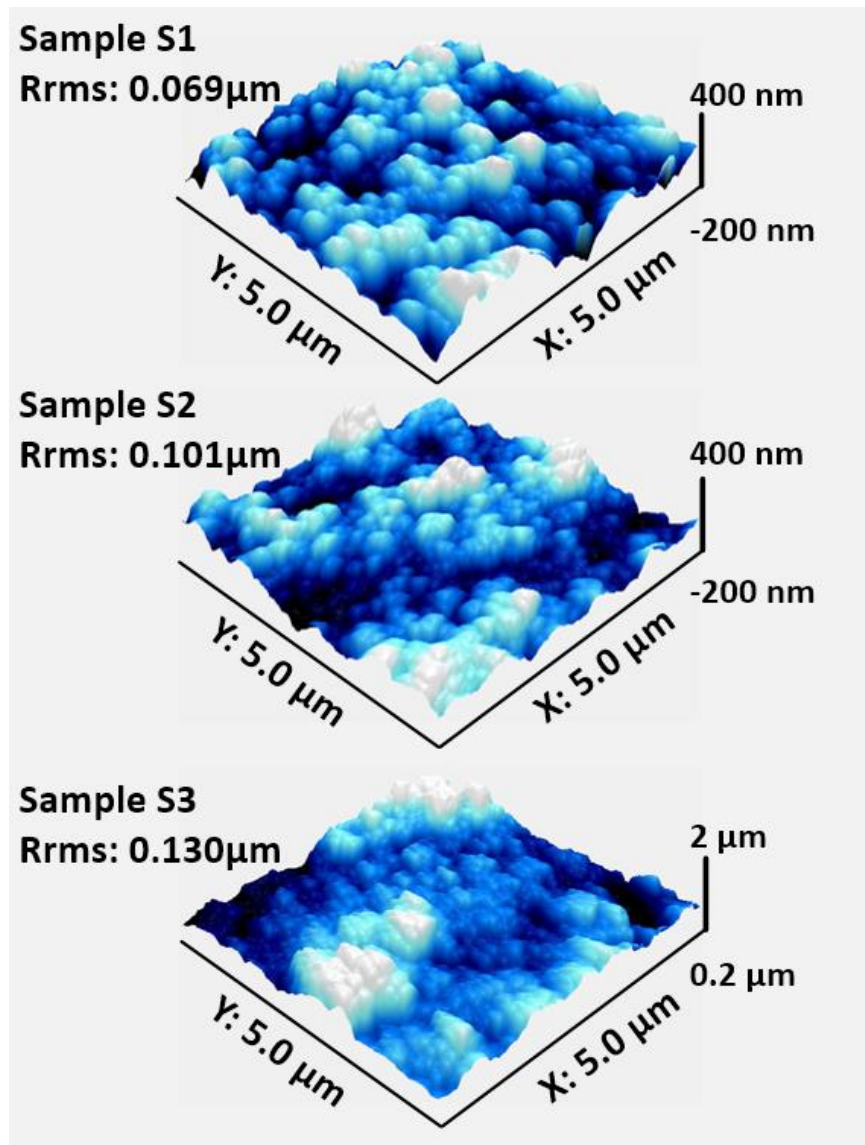

As the concentration of  $\text{TiO}_2$  synthesized at  $-40^\circ\text{C}$  increases in sample S1 and S2 films, the intensity of the columnar microstructure was decreased as percentage of nanorods declined leading to reduced height of the columnar microstructure with increased size of spherical grains. At the highest concentration, an S3 film consisting of nanocrystals with bigger spherical grain size showed the lowest intensity in the columnar microstructure. The increased  $-40^\circ\text{C}$  concentration in compositions enhances roughness along the films and clearly shows improvement in the number of anchoring sites for the dye molecules and electrochemical property of the films.

**Figure S4.** Dye absorbed amount of S1, S2 and S3 sample photoanodes are calculated using absorption spectra.

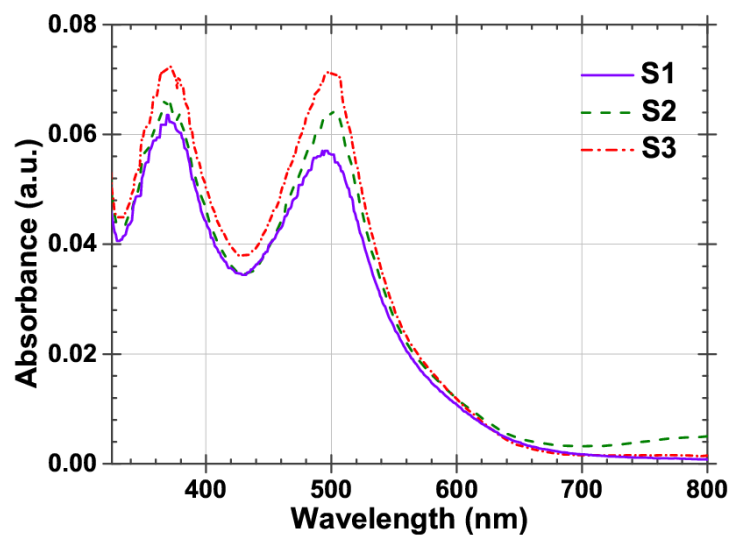

**Figure S5.** Schematic showing film structures and their respective light scattering.

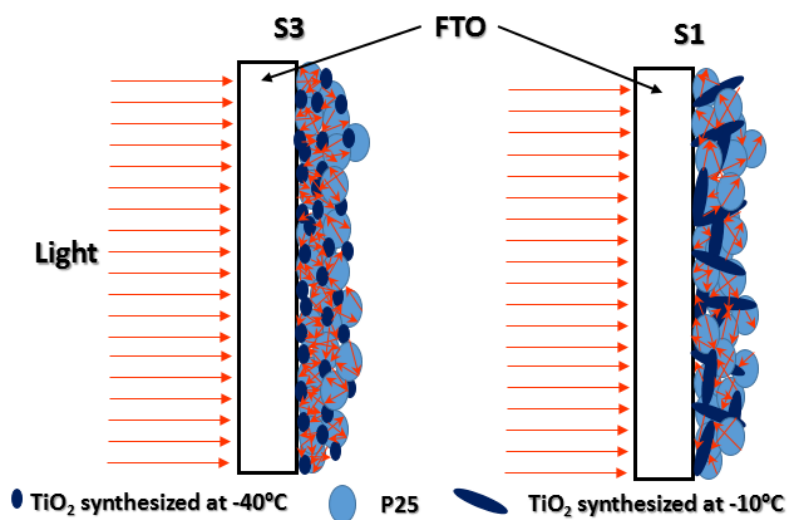

The size of TiO<sub>2</sub> prepared at -40°C was much smaller than that at -10°C. Smaller particles consists of large surface area and together with P25 particles photons from lights have more number of sites to scatter as shown in S1.

**Table A2:** Literature brief about synthesis of titania at low temperature

| Sr. No. | Article                                  | Synthesis Method | Precursor for TiO <sub>2</sub> Synthesis                                                                  | Low Synthesis Temperature (°C) | Phase                      |
|---------|------------------------------------------|------------------|-----------------------------------------------------------------------------------------------------------|--------------------------------|----------------------------|
| 1.      | J. Alloys. Compd. 2015, 647,627          | Sol-gel method   | TTIP                                                                                                      | 25 to 80                       | Anatase                    |
| 2.      | Adv. Sci. 2015, 2, 1500070               | Wet Condition    | TTIP and TiO <sub>2</sub> Nanowire bundles                                                                | 40                             | Anatase & rutile           |
| 3.      | Appl. Surf. Sci. 2015, 355, 1051         | Hydrolysis       | Tetrabutyl titanate                                                                                       | RT                             | Anatase                    |
| 4.      | J. Sol-Gel Sci. Technol. 2015, 76, 395   | Hydrolysis       | Titanium n-butoxide                                                                                       | 40 to 70                       | Anatase, rutile & brookite |
| 5.      | PCCP, 2015, 00, 1                        | Sputtering       | TiO <sub>2</sub> crystal                                                                                  | RT                             | Rutile                     |
| 6.      | Integr. Ferroelectr. 2015, 160 ,142,     | Hydrothermal     | Ti(SO <sub>4</sub> ) <sub>2</sub>                                                                         | 90                             | Anatase                    |
| 7.      | J. Phys. D: Appl. Phys. 2015, 48, 295201 | Sputtering       | Ceramic TiO <sub>2</sub> disc                                                                             | RT to 400                      | Anatase & rutile           |
| 8.      | Appl. Surf. Sci. 2015, 04, 125           | PLD              | TiO <sub>2</sub> pellet                                                                                   | RT to 600                      | Rutile                     |
| 9.      | RSC Adv., 2015, 5, 45122                 | Hydrolysis       | Tetra-n-butyl titanate                                                                                    | 70                             | Rutile                     |
| 10.     | Chem. Eur. J. 2014, 20, 14763            | Hydrothermal     | Tetrabutyl titanate                                                                                       | 180                            | Anatase                    |
| 11.     | J. Colloid and Interf. Sci. 2015, 1, 442 | Sol-gel method   | TTIP                                                                                                      | RT                             | Anatase, rutile & brookite |
| 12.     | J. Phys. Chem. B 2005, 109, 8673         | Hydrothermal     | Tetrabutyl titanate                                                                                       | RT                             | Anatase & rutile           |
| 13.     | J. Phys. Chem. C 2007, 111, 2709         | Hydrolysis       | TiCl <sub>4</sub>                                                                                         | 50                             | Rutile                     |
| 14.     | J. AM. CHEM. SOC. 2003, 125, 14539       | Hydrolysis       | TTIP                                                                                                      | 80                             | Anatase                    |
| 15.     | J. Mater. Chem. A, 2015, 3, 4477         | Sol-gel method   | TTIP                                                                                                      | 50                             | Anatase                    |
| 16.     | RSC Adv., 2015, 5, 15118                 | Hydrolysis       | [Ti <sub>8</sub> O <sub>12</sub> (H <sub>2</sub> O) <sub>24</sub> ]Cl <sub>8</sub> ·HCl·7H <sub>2</sub> O | RT                             | Anatase & rutile           |
| 17.     | Mater. Res. Bull. 2015, 67, 140          | Sol-gel method   | Tetrabutyl titanate                                                                                       | 50 to 90                       | Anatase                    |
| 18.     | Int. J. Electrochem. Sci. 2014, 9, 3068  | Sol-gel method   | Tetrabutyl titanate                                                                                       | 50                             | Anatase & brookite         |
| 19.     | Ferroelectrics, 2013, 457, 30            | Hydrothermal     | TTIP                                                                                                      | 100 to 200                     | Anatase                    |
| 20.     | Environ. Technol. 2014, 35-2, 203        | Hydrothermal     | Tetrabutyl titanate                                                                                       | 100                            | Anatase & brookite         |
| 21.     | Cryst. Res. Technol. 2013, 48-11, 969    | Sol-gel method   | TiCl <sub>4</sub>                                                                                         | 15 to 35                       | Anatase                    |

|     |                                          |                |                                                     |           |                    |
|-----|------------------------------------------|----------------|-----------------------------------------------------|-----------|--------------------|
| 22. | Cryst. Growth Des. 2013, 13, 4730        | Hydrothermal   | TTIP                                                | RT to 200 | Rutile             |
| 23. | J. Mater. Chem. A, 2013, 1, 8045         | Sol-gel method | TTIP                                                | 40 to 75  | Anatase & rutile   |
| 24. | Appl. Catal. B- Environ. 2013, 9, 140    | Hydrothermal   | TTIP                                                | 70        | Rutile             |
| 25. | Appl Nanosci 2013, 3, 167                | Hydrothermal   | TTIP                                                | 100       | Anatase & rutile   |
| 26. | Nanoscale, 2013, 5, 2850                 | Sol-gel method | TTIP                                                | 60        | Anatase            |
| 27. | J. Colloid Interf. Sci. 2013, 90, 396    | Sol-gel method | Titanium n-butoxide                                 | 80        | Anatase            |
| 28. | J. Photoch. Photobio. A 2013, 175, 251   | Sol-gel method | TTIP                                                | 200       | Anatase            |
| 29. | Materials Letters 2013, 92, 287          | Sol-gel method | TTIP                                                | 100       | Anatase            |
| 30  | Appl. Surf. Sci. 2013, 265, 317          | Sol-gel method | Titanium ethoxide                                   | 4         | Anatase            |
| 31  | J. Mater. Chem., 2012, 22, 23906         | Hydrothermal   | TiCl <sub>4</sub>                                   | 120       | Anatase            |
| 32. | Electrochimica Acta 2012, 18, 67         | Hydrolysis     | TTIP                                                | 80        | -                  |
| 33. | J. of Mol. Catal. A- Chem. 2011, 97, 335 | Hydrolysis     | Tetrabutyl titanate                                 | 15        | Anatase & brookite |
| 34. | J. Photoch. Photobio. A 2010, 201, 216   | Sol-gel method | TTIP                                                | RT        | Anatase & rutile   |
| 35. | J. Cryst. Growth 2007, 179, 304          | Sol-gel method | Titanium butoxide                                   | 50        | Anatase & rutile   |
| 36. | Mater. Res. Bull. 2006, 41, 2276         | Hydrothermal   | TTIP                                                | 200       | Anatase            |
| 37. | Photochem. Photobiol. Sci., 2009, 8, 657 | Sol-gel method | TTIP                                                | 85        | Anatase            |
| 38. | J. Phys. Chem. C 2009, 113, 4031         | Hydrolysis     | Tetrabutyl titanate                                 | 40 to 120 | Anatase            |
| 39. | J Nanopart Res 2008, 10, 233             | Sol-gel method | Tetra-n-butyl titanate                              | 103       | Anatase            |
| 40. | Materials Letters 2008, 62, 4563         | Sol-gel method | TiCl <sub>4</sub>                                   | 40        | Rutile             |
| 41. | Chem. Eng. Technol. 2008, 1277, 31- 9    | Hydrolysis     | titanyl diacetate & titanyl dibutoxide tetraacetate | 60 to 80  | Anatase            |
| 42. | J. Phys. Chem. of Solids 2008, 69, 1980  | Sol-gel method | Tetrabutyl titanate                                 | 75        | Anatase            |
| 43. | Mater. Chem. Phys. 2008, 111, 313        | Sol-gel method | Titanium(IV) Sulfate                                | 70        | Rutile             |
| 44. | J. Colloid Interf. Sci. 2010, 345, 181   | Hydrolysis     | TiCl <sub>4</sub>                                   | 100       | Rutile             |
| 45. | J. Phys. Chem. of Solids 2010, 71, 507   | Hydrothermal   | Titanium(IV) Sulfate                                | 160       | Anatase            |
| 46  | Electrochimica Acta., 2015, 160, 296.    | Hydrolysis     | Titanium(IV) butoxide                               | 200       | 100% Anatase       |



|     |                                                                                                                           |                |                       |             |                  |
|-----|---------------------------------------------------------------------------------------------------------------------------|----------------|-----------------------|-------------|------------------|
| 47  | Optik, 2016.<br><a href="http://dx.doi.org/10.1016/j.ijleo.2016.01.034">http://dx.doi.org/10.1016/j.ijleo.2016.01.034</a> | Hydrothermal   | Titanium(IV) butoxide | 150         | 100% Rutile      |
| 48. | Our study                                                                                                                 | Sol-gel method | TTIP                  | -40 and -10 | Anatase & rutile |

RT=Room Temperature
